# Supplementary material for: Praxis : detection of inconsistency within distributed models
Source: Royal Society of Chemistry journal article supplement (doi:10.1039/d3dt03989g), 2010-01-01
Supplement: d3dt03989g1.pdf [file d3dt03989g1.pdf]

## Supporting Information

### Highly stable CsPbBr<sub>3</sub> perovskite phases from new lead β-diketonate glyme adducts

Lorenzo Sirna,<sup>a</sup> Anna L. Pellegrino,<sup>a,\*</sup> Salvatore P. Sciacca,<sup>a</sup> Martina Lippi,<sup>b</sup> Patrizia Rossi,<sup>b</sup> Carmela Bonaccorso,<sup>c</sup> Giuseppe Bengasi,<sup>d</sup> Marina Foti,<sup>d</sup> Graziella Malandrino<sup>a,\*</sup>

<sup>a</sup> Dipartimento Scienze Chimiche, Università degli Studi di Catania, and INSTM UdR Catania, Viale Andrea Doria 6, 95125 Catania, Italy

<sup>b</sup> Dipartimento di Ingegneria Industriale, Università di Firenze, Via Santa Marta 3, 50136 Firenze, Italy

<sup>c</sup> Dipartimento Scienze Chimiche, Università degli Studi di Catania, Viale Andrea Doria 6, 95125 Catania, Italy

<sup>d</sup> 3SUN s.r.l., Contrada Blocco Torrazze, 95121, Catania, Italy

Corresponding: [annalucia.pellegrino@unict.it](mailto:annalucia.pellegrino@unict.it), [graziella.malandrino@unict.it](mailto:graziella.malandrino@unict.it)

#### Table of contents

**Fig. S1.** Ball and stick view of the two independent molecules of Pb(hfa)<sub>2</sub>•monoglyme.

**Fig. S2.** Superimposition of the two independent Pb (II) complexes in Pb(hfa)<sub>2</sub>•monoglyme.

**Table S1.** Selected bond lengths and angles in Pb(hfa)<sub>2</sub>monoglyme.

**Fig. S3.** <sup>1</sup>H NMR spectra of the Pb(hfa)<sub>2</sub>•glyme complexes 1-4.

**Fig. S4.** <sup>13</sup>C NMR spectra of the Pb(hfa)<sub>2</sub>•glyme complexes 1-4.

**Fig. S5.** <sup>13</sup>C-NMR signals for the CF<sub>3</sub> and CO groups of the Pb(hfa)<sub>2</sub>•glyme complexes 1-4.

**Fig S6.** EDX Spectrum and quantitative analysis of the TGA residue of [Pb(hfa)<sub>2</sub>•triglyme•H<sub>2</sub>O].

**Fig S7.** ATR-IR spectra of CsPbBr<sub>3</sub>\_1, CsPbBr<sub>3</sub>\_2, CsPbBr<sub>3</sub>\_3 and CsPbBr<sub>3</sub>\_4 microcrystals.

**Fig S8.** TGA curves of CsPbBr<sub>3</sub>\_1, CsPbBr<sub>3</sub>\_2, CsPbBr<sub>3</sub>\_3 and CsPbBr<sub>3</sub>\_4 microcrystals.

**Fig S9.** EDX Spectrum and quantitative analysis of CsPbBr<sub>3</sub>\_1.

**Fig S10.** EDX Spectrum and quantitative analysis of CsPbBr<sub>3</sub>\_2.

**Fig S11.** EDX Spectrum and quantitative analysis of **CsPbBr<sub>3</sub>\_3**.

**Fig S12.** EDX Spectrum and quantitative analysis of **CsPbBr<sub>3</sub>\_4**.

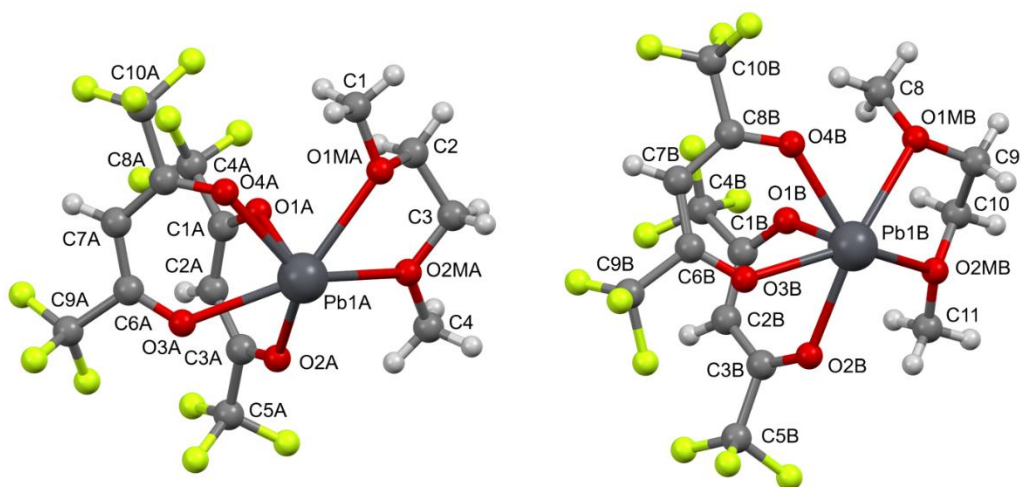

**Fig. S1.** Ball and stick view of the two independent molecules of  $\text{Pb}(\text{hfa})_2 \cdot \text{monoglyme}$  showing the atom labelling for the Pb, O and C atoms. For the sake of clarity only one model was reported for the disordered moieties.

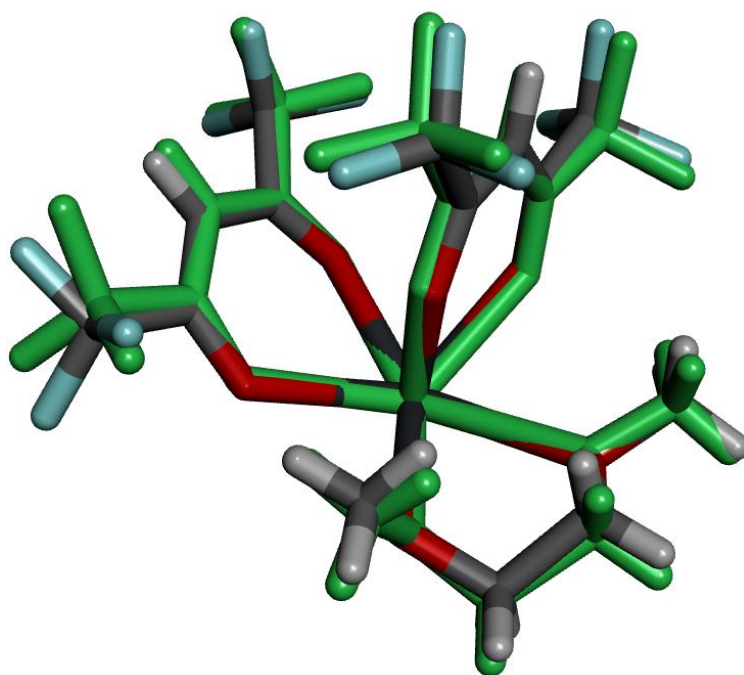

**Fig. S2.** Superimposition of the two independent Pb (II) complexes in  $\text{Pb}(\text{hfa})_2 \cdot \text{monoglyme}$ . (stick, color by elements: Pb1A complex; stick, pale green: Pb1B complex)

**Table S1.** Selected bond lengths (Å) and angles (°) in **Pb(hfa)<sub>2</sub>monoglyme**.

| Pb-X                     |           |                          |           |
|--------------------------|-----------|--------------------------|-----------|
| Pb1A-O1A                 | 2.369(6)  | Pb1B-O1B                 | 2.347(5)  |
| Pb1A-O2A                 | 2.509(4)  | Pb1B-O2B                 | 2.523(5)  |
| Pb1A-O3A                 | 2.546(5)  | Pb1B-O3B                 | 2.476(5)  |
| Pb1A-O4A                 | 2.509(5)  | Pb1B-O4B                 | 2.466(4)  |
| Pb1A-O1MA                | 2.620(5)  | Pb1B-O1MB                | 2.729(6)  |
| Pb1A-O2MA                | 2.665(6)  | Pb1B-O2MB                | 2.738(5)  |
| Pb1A...Pb1A <sup>1</sup> | 3.8012(5) | Pb1B...Pb1B <sup>2</sup> | 3.9518(6) |
|                          |           |                          |           |
| X-Pb-Y                   |           |                          |           |
| O1A-Pb1A-O2A             | 73.5(2)   | O1B-Pb1B-O2B             | 73.6(2)   |
| O1A-Pb1A-O3A             | 81.0(2)   | O1B-Pb1B-O3B             | 82.7(2)   |
| O1A-Pb1A-O4A             | 72.6(2)   | O1B-Pb1B-O4B             | 74.9(2)   |
| O1A-Pb1A-O1MA            | 79.5(2)   | O1B-Pb1B-O1MB            | 76.4(2)   |
| O1A-Pb1A-O2MA            | 78.8(2)   | O1B-Pb1B-O2MB            | 76.3(2)   |
| O2A-Pb1A-O3A             | 65.8(2)   | O2B-Pb1B-O3B             | 66.3(2)   |
| O2A-Pb1A-O4A             | 127.5(2)  | O2B-Pb1B-O4B             | 129.6(2)  |
| O2A-Pb1A-O1MA            | 132.7(2)  | O2B-Pb1B-O1MB            | 134.7(1)  |
| O2A-Pb1A-O2MA            | 73.6(2)   | O2B-Pb1B-O2MB            | 77.3(2)   |
| O3A-Pb1A-O4A             | 70.3(2)   | O3B-Pb1B-O4B             | 71.5(2)   |
| O3A-Pb1A-O1MA            | 146.1(2)  | O3B-Pb1B-O1MB            | 141.1(1)  |
| O3A-Pb1A-O2MA            | 138.3(2)  | O3B-Pb1B-O2MB            | 141.9(2)  |
| O4A-Pb1A-O1MA            | 77.5(2)   | O4B-Pb1B-O1MB            | 71.5(1)   |
| O4A-Pb1A-O2MA            | 134.9(2)  | O4B-Pb1AB-O2MB           | 130.5(2)  |
| O1MA-Pb1A-O2MA           | 63.3(2)   | O1MB-Pb1B-O2MB           | 63.1(2)   |

<sup>1</sup> = -x, -y, 1-z; <sup>2</sup> = 1-x, 1-y, -z

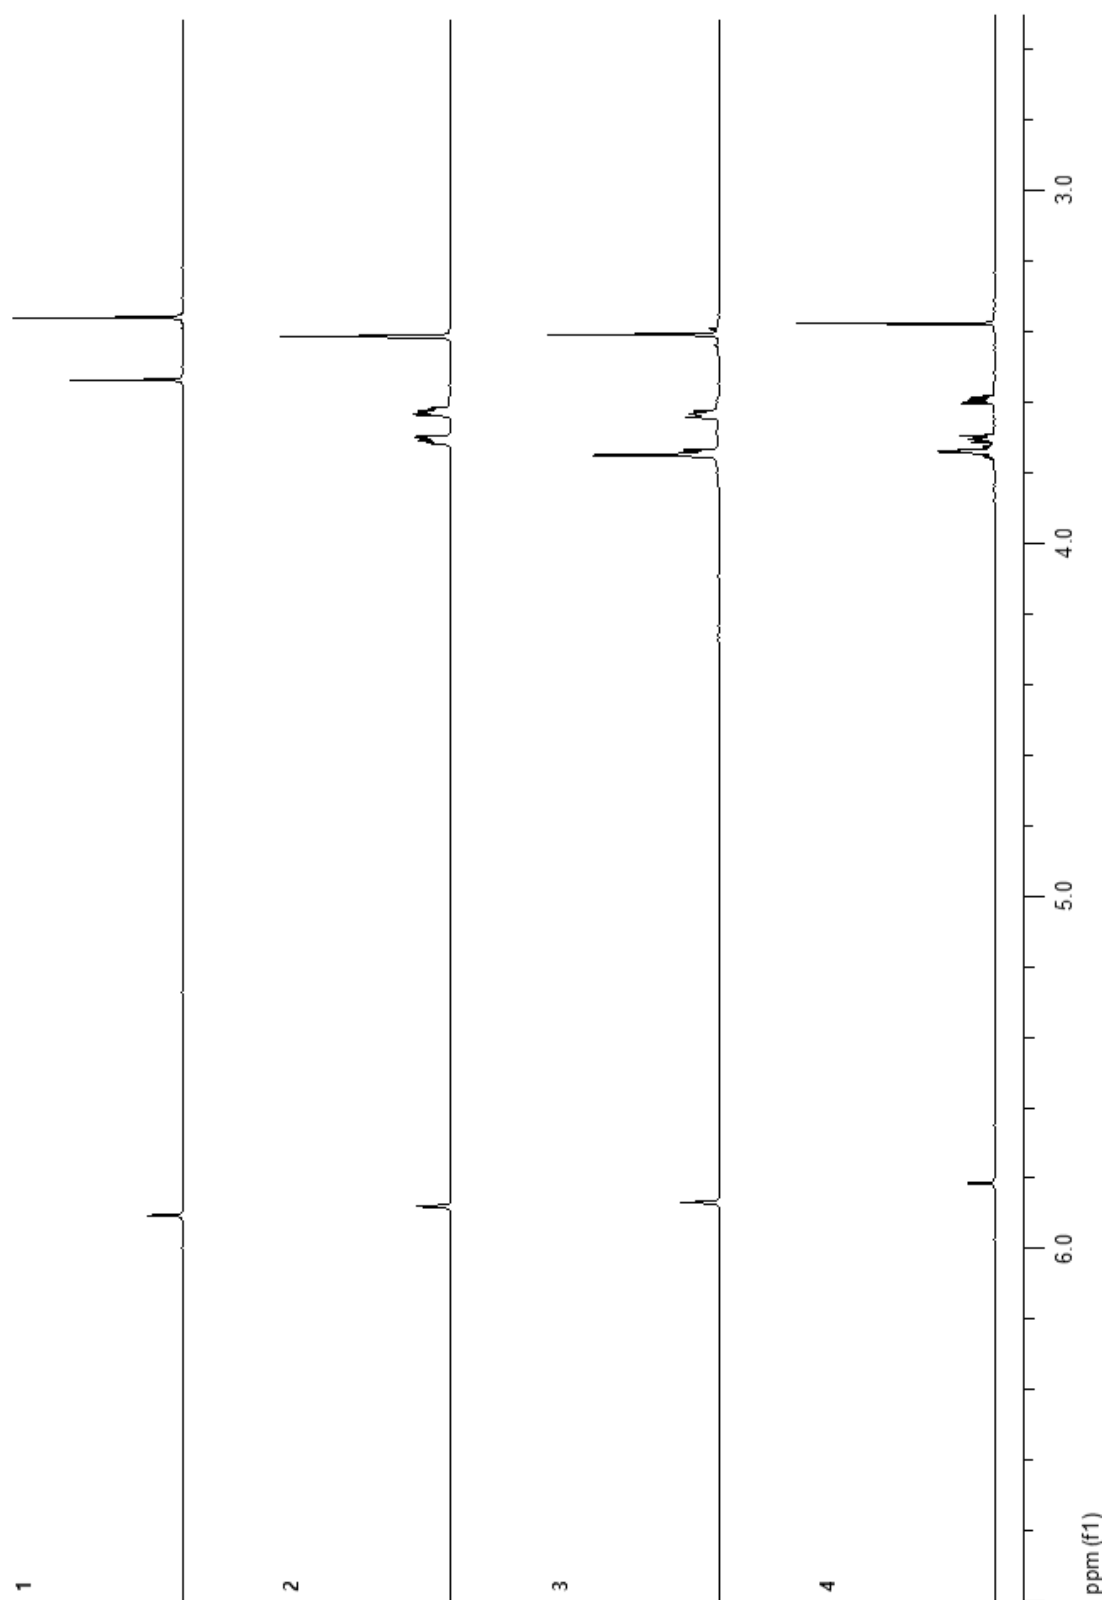

**Fig. S3.** <sup>1</sup>H NMR spectra of the Pb(hfa)<sub>2</sub>•glyme complexes 1-4 (CD<sub>3</sub>CN, 500 MHz, 27 °C).

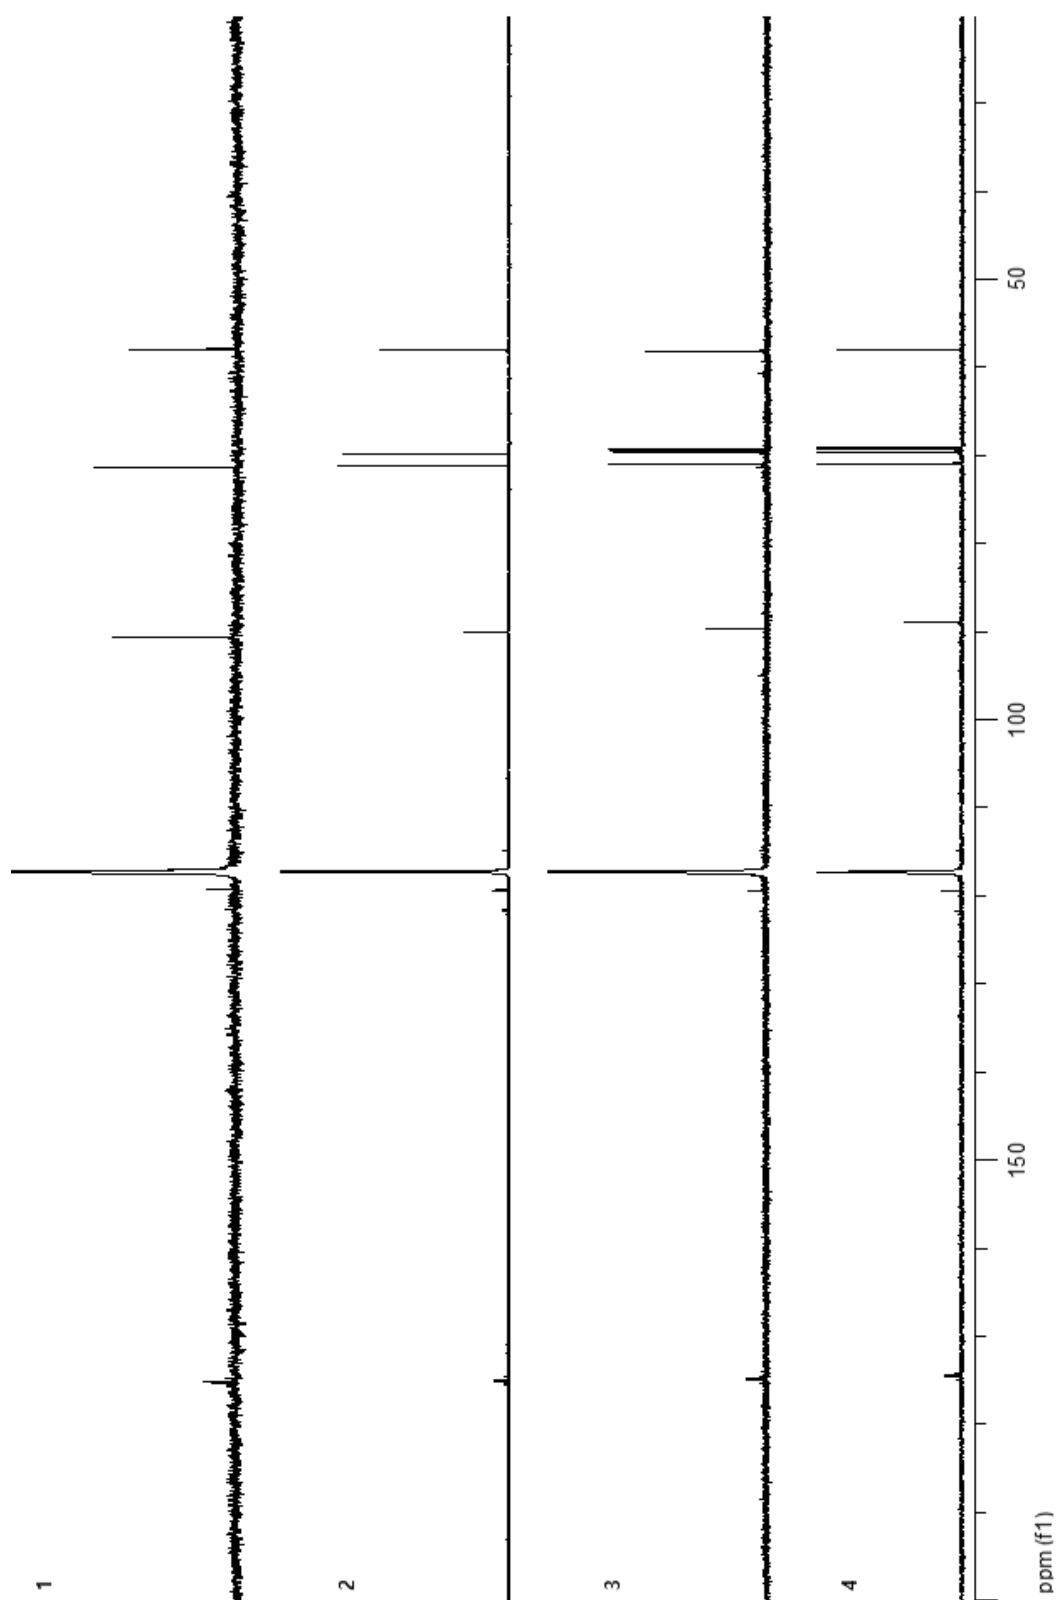

**Fig. S4.**  $^{13}\text{C}$  NMR spectra of the  $\text{Pb}(\text{hfa})_2 \cdot \text{glyme}$  complexes 1-4 ( $\text{CD}_3\text{CN}$ , 125 MHz,  $27^\circ\text{C}$ ).

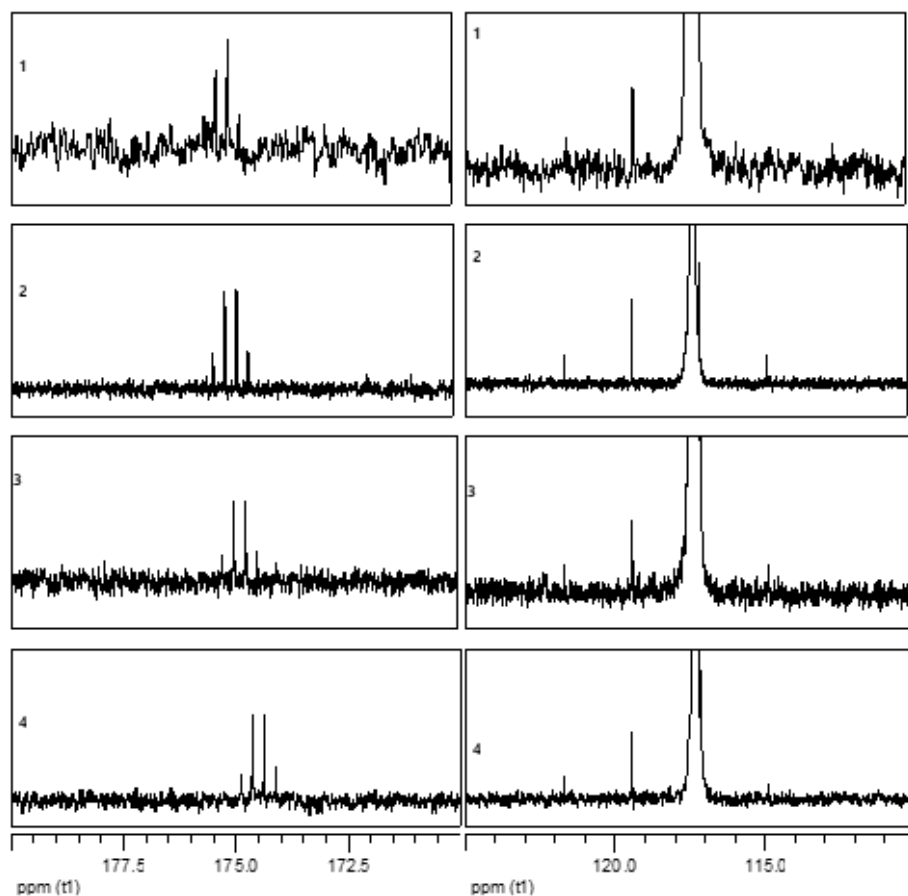

**Fig. S5.**  $^{13}\text{C}$ -NMR signals for the  $\text{CF}_3$  and CO groups of the  $\text{Pb}(\text{hfa})_2 \cdot \text{glyme}$  complexes 1-4 ( $\text{CD}_3\text{CN}$ , 125 MHz, 27 °C).

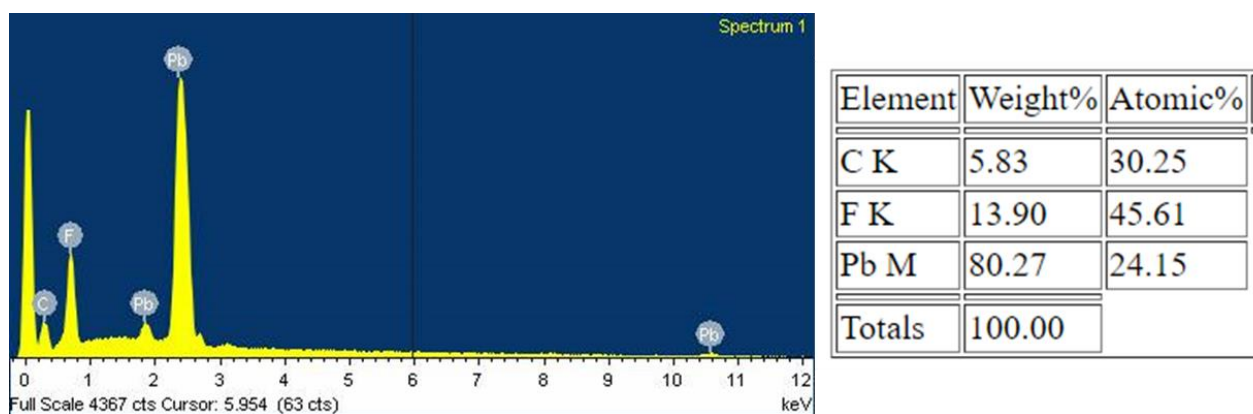

**Fig S6.** EDX Spectrum of TGA residue of  $[\text{Pb}(\text{hfa})_2 \cdot \text{triglyme} \cdot \text{H}_2\text{O}]$  and quantitative analysis of the residue.

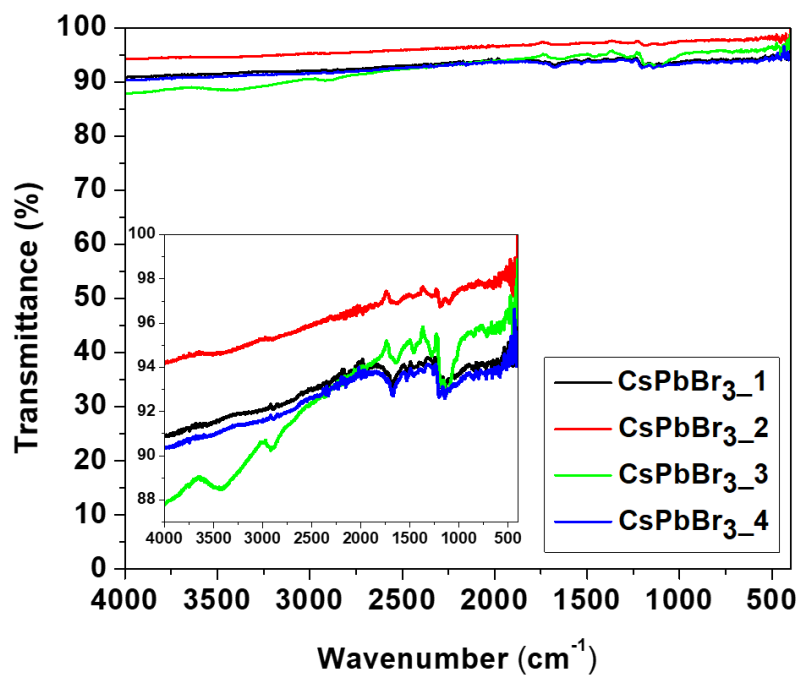

**Fig S7.** ATR-IR spectra of  $\text{CsPbBr}_3_1$ ,  $\text{CsPbBr}_3_2$ ,  $\text{CsPbBr}_3_3$  and  $\text{CsPbBr}_3_4$  microcrystals.

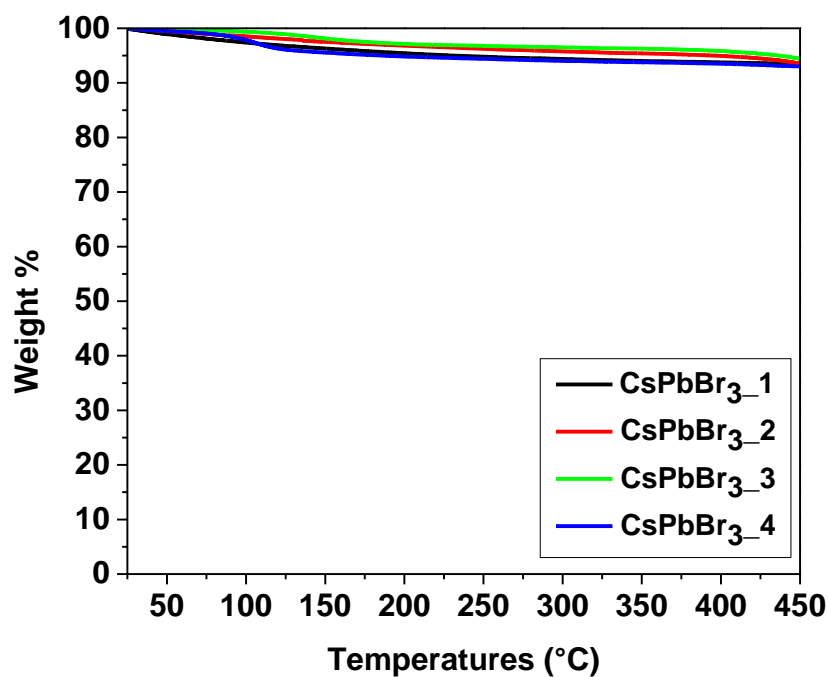

**Fig S8.** TGA curves of  $\text{CsPbBr}_3_1$ ,  $\text{CsPbBr}_3_2$ ,  $\text{CsPbBr}_3_3$  and  $\text{CsPbBr}_3_4$  microcrystals.



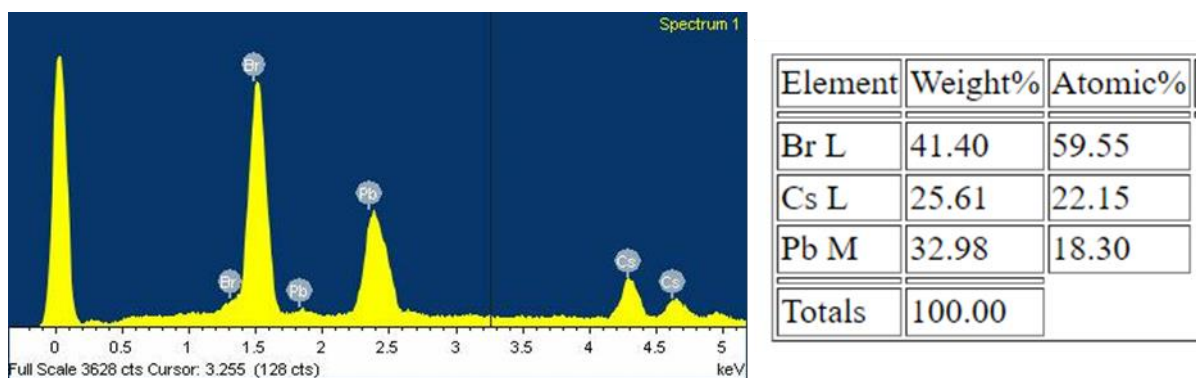

**Fig S9.** EDX Spectrum of CsPbBr<sub>3</sub>\_1 and quantitative analysis of the powder.

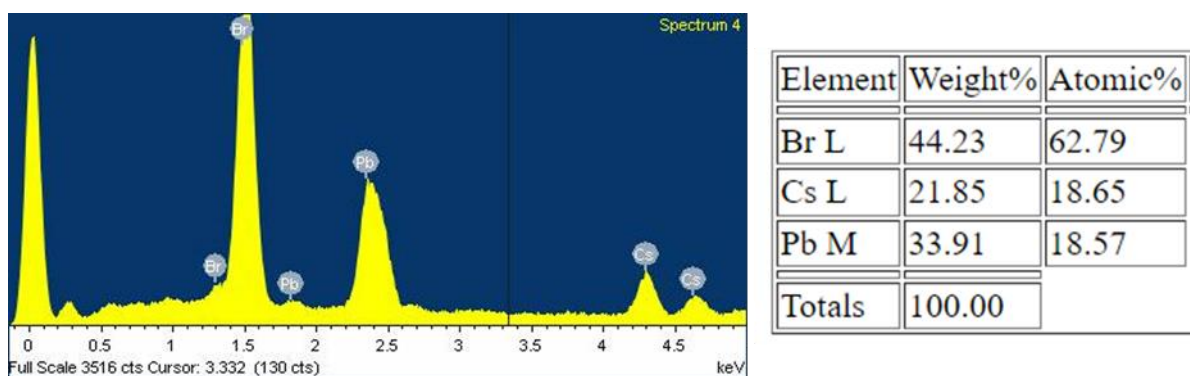

**Fig S10.** EDX Spectrum of CsPbBr<sub>3</sub>\_2 and quantitative analysis of the powder.

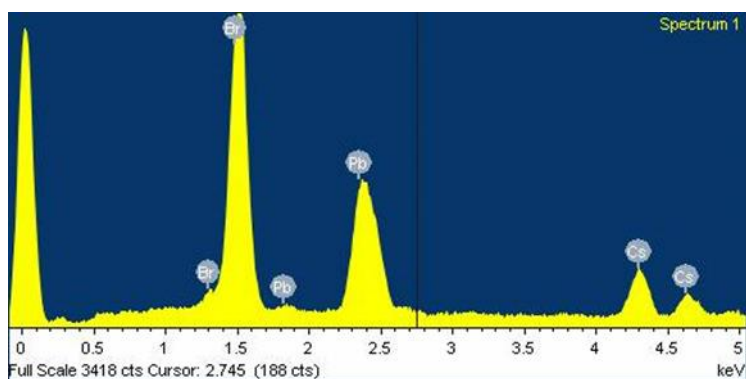

| Element | Weight% | Atomic% |
|---------|---------|---------|
| Br L    | 42.12   | 60.51   |
| Cs L    | 24.00   | 20.73   |
| Pb M    | 33.87   | 18.76   |
| Totals  | 100.00  |         |

**Fig S11.** EDX Spectrum of CsPbBr<sub>3</sub>\_3 and quantitative analysis of the powder.

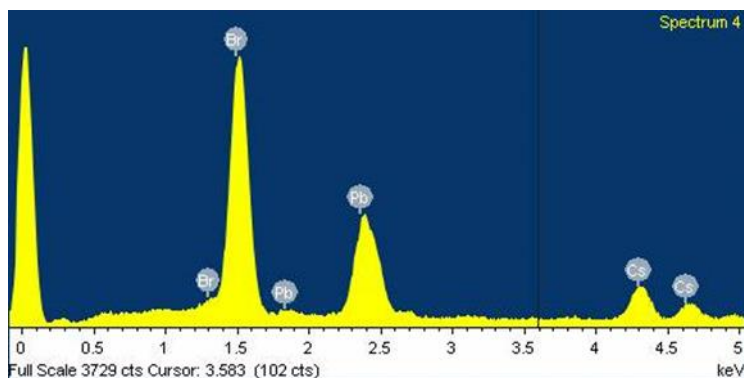

| Element | Weight% | Atomic% |
|---------|---------|---------|
| Br L    | 44.53   | 62.96   |
| Cs L    | 22.31   | 18.96   |
| Pb M    | 33.15   | 18.08   |
| Totals  | 100.00  |         |

**Fig S12.** EDX Spectrum of CsPbBr<sub>3</sub>\_4 and quantitative analysis of the powder.
